# Supplementary material for: Multi-Echo Complex Quantitative Susceptibility Mapping and Quantitative Blood Oxygen Level Dependent Magnitude (mcQSM+qBOLD or mcQQ) for Oxygen Extraction Fraction (OEF) Mapping
Source: Preprints.org preprint supplement (doi:10.20944/preprints202312.2063.v1), 2023-12-27
Supplement: Supplementary file 1 [file supplementary]

**Supplementary Materials**

**
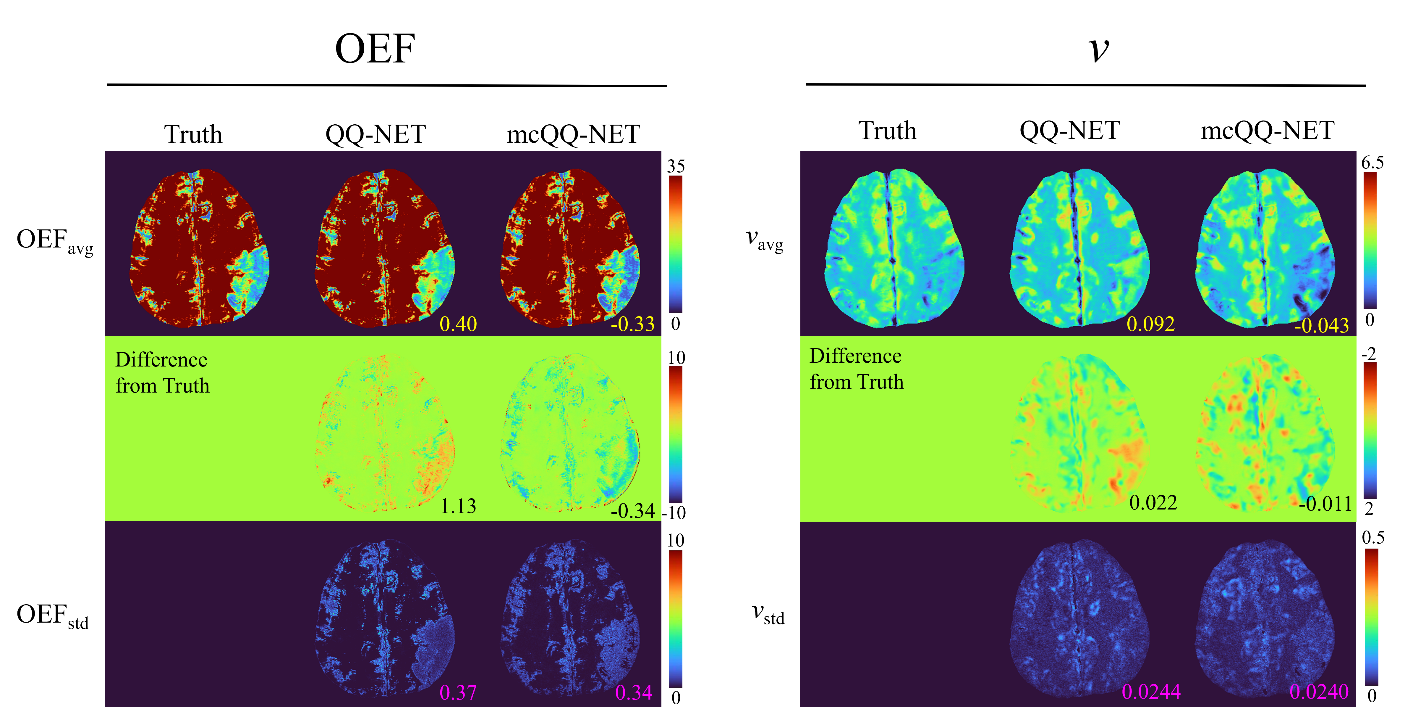
**

**Figure S1.** Comparison of OEF and *v* obtained by QQ-NET and mcQQ-NET in the simulated brain (Test Data 1). OEFavg and *v*avg indicate the average OEF and *v* maps, respectively, from five trials. OEFavg and *v*avg are shown in the unit of [%]. The numbers in yellow and black represent the mean error in the whole brain and lesion, respectively. QQ-NET showed higher OEFavg and *v*avg than the ground truth in low OEF lesions. Compared to QQ-NET, mcQQ-NET demonstrated a smaller bias in OEFavg and *v*avg in the lesion.


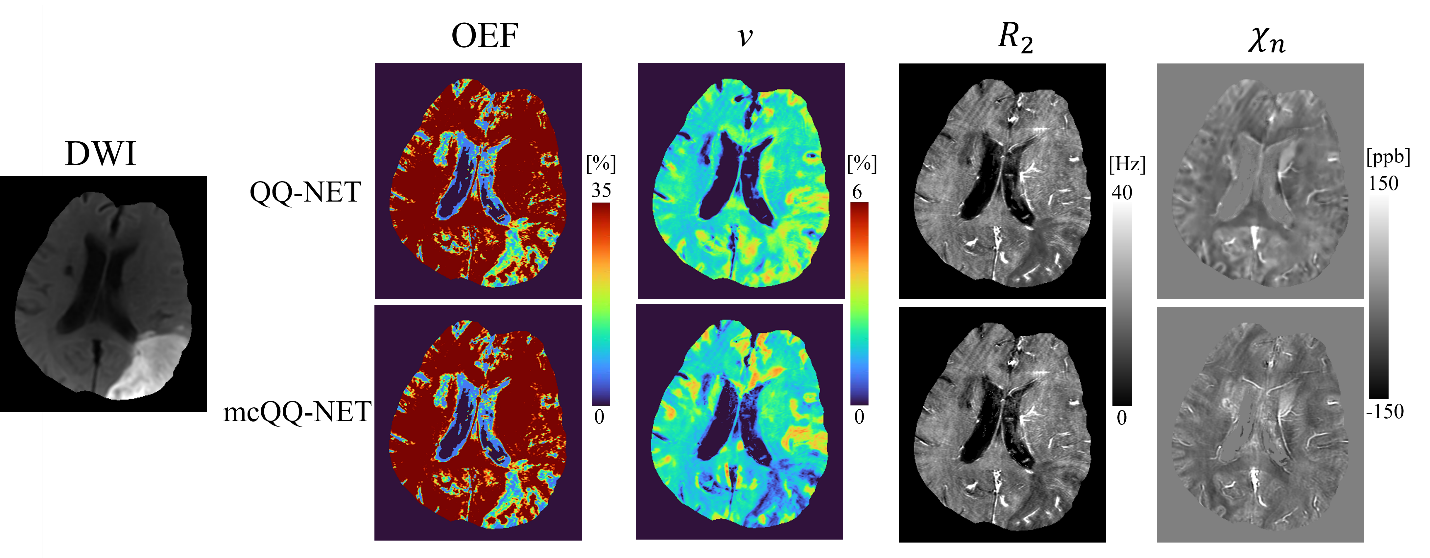


**Figure S2.** Comparison of OEF, *v*, R2, and maps between QQ-NET and mcQQ-NET in a stroke patient imaged 4 days post stroke onset (Test Data 2). mcQQ-NET provided low OEF and low *v* values in the DWI-defined lesion.
